# Supplementary material for: T5224, RSPO2 and AZD5363 are novel drugs against functional pituitary adenoma
Source: Aging (Albany NY). 2019 Oct 26;11(20):9043–59. doi: 10.18632/aging.102372 (PMC6834428; doi:10.18632/aging.102372)
Supplement: Supplementary Table [file aging-11-102372-s001.xls]

## Sheet: Sheet1
Names	total	elements
GSE2175 GSE26966 GSE36314 GSE37153	179	BBOX1
		NR4A2
		AP1S2
		MAOA
		PPM1A
		ID1
		NCDN
		CNTN2
		MAD2L1
		ACO2
		UBE2N
		MANF
		ERCC8
		KIAA0368
		CDKN2B
		CSHL1
		GAL
		LRRFIP1
		CDK18
		NTRK2
		SLC8A2
		CLDN3
		HIP1R
		COL4A6
		DOPEY1
		NKX2-2
		SLC4A4
		NDST1
		RGS16
		SPON1
		MAPRE3
		DFNA5
		CAMK2G
		ARHGEF11
		GRIK5
		C14orf1
		FAM69A
		PATZ1
		NOV
		GPM6B
		TFPI2
		MFSD9
		GNAL
		COL9A2
		GNAS
		KATNB1
		BCLAF1
		EMP2
		SLC6A15
		RIN2
		PPP2R5A
		PHLDA1
		LRP5
		DBP
		THBS4
		IGFBP6
		KRT18
		CSPG5
		HTATSF1
		NTNG1
		GHRHR
		PIP5K1B
		POLR2E
		SOX2
		POU1F1
		FBN2
		FGFR2
		GH2
		FRAT2
		RRBP1
		MAZ
		STX3
		CCNO
		TMEM158
		AFF2
		PLXNA2
		STXBP5L
		CADM3
		MICAL3
		THBS2
		MEG3
		ENPP1
		SCNN1A
		CCND2
		PDLIM3
		SEMA5A
		PVRL3
		BCAT1
		KLK11
		NRG1
		CASK
		AMD1
		ATP8B1
		KAT6B
		C9orf91
		HES1
		BCL2
		NCAM1
		SORBS2
		RPN1
		WIF1
		CUL3
		CLIC5
		RALB
		SLIT1
		ADCY1
		FAM3C
		BCR
		NR4A1
		CNTN1
		IPCEF1
		FILIP1L
		JUP
		POMC
		ROR1
		AKT3
		TGFB2
		PTPRE
		SDHB
		RXRA
		ZBTB22
		ATP11A
		KIF11
		JAKMIP2
		CNR1
		ZFP36L2
		MPP2
		KDELR3
		VDR
		CREB3L2
		CLU
		RABL3
		CHD5
		GH1
		MIOS
		ADAM22
		TSHB
		ARHGEF10
		S100A9
		TRIM29
		CEL
		AP3B1
		ASAP2
		WNT5A
		IMPA2
		GCNT2
		SREBF2
		IGFBP5
		CREM
		KCNQ1
		NAP1L1
		PRKCZ
		AKAP6
		PDLIM4
		HLA-G
		PMAIP1
		GLDC
		SGCD
		CNOT8
		DLK1
		APC
		ALK
		MGAT5
		TNNC1
		C12orf29
		USP13
		PCK1
		IRAK3
		MEGF8
		ANGPT1
		SEMA6A
		PTPRK
		SLC9A1
		PRLR
		AKAP13
		PEX19
		ASCL1
		ATP2A2
GSE2175 GSE26966 GSE36314	820	CREB3L1
		CXCR4
		SALL1
		CADM4
		TMSB10
		SELL
		CNGA3
		NEFH
		DUSP4
		CDK8
		PPP1R3D
		HS2ST1
		CPEB3
		COL18A1
		FUS
		TF
		CLCN4
		ASS1
		ADAM23
		SNAPC1
		QKI
		CGA
		CDH8
		LTBR
		SLC9A3R1
		OSBP
		FHL1
		RSU1
		RBPMS
		KLF4
		LMO4
		HP
		DCX
		DNAJC9
		NDUFB8
		RCAN1
		HSPA2
		KALRN
		LPPR4
		FGF12
		LOC101928916 /// NNMT
		KIAA0232
		TYMS
		PTP4A3
		MAP2K4
		EPB41L3
		PSMB8
		NR4A3
		SOCS3
		MAGI1
		NIPA2
		PCYT1B
		AMOTL2
		FOXO1
		KIF5C
		HMGXB4
		ALDH5A1
		DPP6
		RPS6KA2
		GADD45B
		ZFYVE9
		ANXA2
		MCF2L
		FH
		EIF4E
		PIK3C2B
		MFGE8
		PAK7
		CLIC4
		PAX6
		ITGBL1
		CYB5B
		ZFP36L1
		PURA
		CREB1
		ZHX2
		LRP8
		STAT5B
		SKI
		PTPRG
		SLC16A4
		SLC6A8
		MBTPS2
		BHLHE40
		ADIRF
		TNIP1
		ODC1
		TP53TG1
		ASH2L
		SLC1A3
		SULF1
		MPHOSPH9
		LOC100131510
		FAM168A
		RARRES1
		DMD
		IGH /// IGHA1 /// IGHA2
		ID2 /// ID2B
		CAV2
		TFCP2
		KDELR2
		IGFBP3
		GSE1
		N4BP2L1
		TIMP4
		SLIT2
		CCP110
		CASP4
		SERPINA3
		C9orf3
		KAZN
		CSNK2A1
		TWIST1
		AOX1
		CYR61
		MAFF
		LY96
		IL1R1
		RNASE4
		SAT1
		RFX2
		MLLT4
		MEF2C
		ERBB4
		ATRX
		IER2
		CHRDL1
		NID1
		CLGN
		HCP5
		RNF41
		MSN
		TBC1D31
		GPNMB
		NFATC4
		PRL
		ABCG1
		EML1
		NUP93
		HBEGF
		EXD2
		IPO8
		ZNF117
		DUSP2
		VSNL1
		IGFBP7
		ZNF318
		EGR1
		CD58
		PLAGL1
		LLGL1
		KLF6
		THBD
		PDE9A
		ABCA8
		COL6A2
		MOCS3
		TMEM47
		STC1
		GGPS1
		STAT3
		LOC100996792 /// MAP2K3
		TMED5
		SFN
		U2AF1
		GRAMD4
		MT1X
		S100A8
		C7
		TRAPPC10
		MR1
		TXNIP
		NUDT3
		FXR1
		KCTD20
		WDR47
		PRPF40A
		GADD45G
		IFITM3
		PTPRN2
		MYOM2
		PYGL
		FAM65B
		ID4
		COL4A4
		SLC1A1
		FOS
		SPOCK2
		HTATIP2
		DIAPH1
		IGLC1
		LDB2
		PCM1
		AEBP1
		ISG20
		BTN3A3
		CCZ1 /// CCZ1B
		MAP2
		DZIP3
		RAB13
		FBXW11
		PRSS16
		LOC100507472 /// PCSK6
		MYO7A
		ACVR1B
		TGFBR2
		WWTR1
		ARHGAP6
		UGP2
		CUX1
		AIM2
		ANK3
		CDH12
		ARHGEF4 /// LOC101930241
		MT1H
		DDI2 /// RSC1A1
		GPRC5B
		CDC5L
		ERN1
		ATP1B3
		CRKL
		RASA3
		PHTF2
		ADCY9
		RASSF1
		FBLN5
		ITPR3
		RXRB
		DLG1
		G3BP1
		PON3
		FGFR1
		FRY
		CCDC64
		ALDH2
		TRIM2
		SERPING1
		MAFK
		PDZRN3
		PENK
		SMAD9
		KDM5A
		ZBTB18
		IGLV1-44
		DGKD
		SERTAD2
		FAIM3
		CSTA
		PAFAH1B3
		CEBPD
		ZFP36
		NEDD4L
		BRINP3
		KRT8
		EPS15
		GNS
		SPIDR
		ATP6V1A
		ESR1
		NACA
		GLOD4
		PDE4D
		ORC5
		DAG1
		RPS24
		MIA
		SMARCA1
		WEE1
		PLXND1
		EFEMP1
		AJAP1
		ZFX
		LUM
		C1S
		ME2
		HNRNPD
		MKNK2
		NOL4
		ZNF365
		MAPK1
		ARHGAP1
		SRPX2
		AQP3
		NISCH
		PHACTR2
		APOD
		RBBP8
		JADE2
		EXTL3
		SUZ12
		GGCX
		CD302 /// LY75 /// LY75-CD302
		ARFGAP3
		SMTN
		CAT
		TPM2
		ABCA2
		PRKCH
		ADM
		VPS72
		CD47
		PPIC
		INHA
		FXYD1
		KCND2
		UBE3A
		GALNT1
		FBXO28
		GAS6
		ETV1
		AUTS2
		HNRNPA1
		SIK1
		EFCAB11
		PVRL1
		LEPREL4
		SOX13
		ALPK3
		SLC39A7
		ST3GAL1
		BDNF
		HSPB3
		GNG5
		CDH2
		ARID5B
		PLXNC1
		ECM1
		DEFA1 /// DEFA1B /// DEFA3
		AASDHPPT
		CKS1B
		NPTX2
		CSK
		RAB27B
		MYOF
		PRPF6
		BLM
		FHL2
		LMO2
		B4GALT6
		SLPI
		GAMT
		PAPPA2
		PFKFB3
		AGTR1
		MTERF4
		CRYBG3
		MAN2A1
		ASPHD1
		PER2
		BOLA2 /// SMG1P2 /// SMG1P5
		ARHGAP8 /// PRR5-ARHGAP8
		CSNK1A1
		DHRS3
		ATF4
		SLC7A8
		TEF
		FERMT2
		ENG
		HLA-F
		RARA
		SERPINH1
		ACTL6B
		CD24
		TPM4
		HERPUD1
		BCL2L11
		INHBA
		PXDC1
		SEPP1
		RARRES2
		SORBS1
		ZNF451
		RAB3B
		FGF9
		MINOS1-NBL1 /// NBL1
		CALU
		TNFSF12-TNFSF13 /// TNFSF13
		COL2A1
		2018-03-02
		TGOLN2
		VAMP3
		TRIM32
		NPR2
		DST
		RRM1
		SRGAP3
		ETV5
		CFB
		RIMS2
		YBX3
		CEP152
		CLIP1
		NUMA1
		ELL2
		FZD1
		IGFBP4
		CEBPB
		TBC1D9
		TGFBI
		GGA2
		CD44
		FARP1
		BTG2
		RGN
		COL4A5
		SLC15A2
		MET
		PHYHIP
		MAPKAPK2
		EIF4G3
		KIAA1211L
		ATXN7L3B
		DUSP5
		PXDN
		PTRF
		THRB
		SPTBN1
		IRS1
		HSF2
		MFN2
		CDK17
		IGF2 /// INS-IGF2
		PRDX4
		ABCF2
		FGF1
		NFIL3
		AGTPBP1
		STAT5A
		AHNAK
		NFE2L2
		IFI27
		SKAP2
		IDS
		PARG
		DOK4
		SOX9
		CRABP1
		APBA2
		ATP2B2
		CPVL
		TRAM2
		KLHL21
		IRF7
		TNFRSF1A
		GTF2H5
		PHGDH
		MGP
		CCDC85B
		ZNF536
		CDH11
		AREG
		NRXN1
		DPY19L2P2
		SRSF3
		ICAM2
		CA12
		MAN1A2
		RPP30
		CGB1 /// LHB
		ZDHHC17
		CCSER2
		EIF2AK2
		RAB6A /// WTH3DI
		SP110
		PNMA2
		RFPL1S
		CDK13
		STAB1
		MYT1L
		LRRTM2
		EIF4A1 /// SNORA48 /// SNORA67 /// SNORD10
		KLF5
		C11orf80
		THBS1
		MCM4
		PDZD2
		GUSBP11
		ID2
		RHOQ
		GNG11
		ZER1
		GRK4
		PPP2CA
		PDE4DIP
		GAS1
		MCF2
		VCAN
		LSR
		NREP
		DLG5
		DHRS1
		CX3CR1
		ABCC8
		LOC101928198 /// MFAP3L
		COL1A2
		CTTN
		LOC81691
		ACKR3
		AGR2
		HDLBP
		RAP1GDS1
		PTGER3
		KANK1
		PTN
		FAM115A /// LOC100294033
		ID3
		CAPN3
		ERC2-IT1
		JAM3
		CHSY1
		DOLK
		MAP3K5
		CIB2
		RPP40
		UBE2I
		MYO6
		CRYAB
		CCT2
		SOS2
		Gene Symbol
		ZSCAN26
		TAP1
		ETS2
		MERTK
		NUPR1
		MYO10
		OLFM1
		MAPK9
		DYRK2
		PCLO
		IFITM2
		FZD7
		CHL1
		GSN
		ANK2
		VEGFC
		VIM
		PDK2
		IFNGR2
		DUSP1
		SEMA7A
		NEUROD1
		SRGN
		VDAC3
		PRUNE2
		FCHSD2
		SLC4A7
		STAT6
		MCL1
		CTGF
		ITGB3BP
		DHX9
		CLK1
		CD163
		LOC100996724 /// LOC100996761 /// LOC101929792 /// LOC101930416 /// PDE4DIP
		STXBP2
		CD59
		BST2
		BMPR2
		EAPP
		TAF13
		TBC1D30
		ERBB3
		FUT9
		LOC101928061 /// SERP1
		MED1
		CXCL12
		LGI1
		IGF1R
		ALDH1A1
		NLGN1
		SPARCL1
		PRSS23
		RABEP1
		CDK5R1
		RPS19
		S100A10
		BAZ1A
		CAP2
		INSR
		NRCAM
		HIPK2
		DAP
		MCM6
		RPGR
		PTP4A1
		LCN2
		AKR1C3
		SPARC
		CBX5
		FICD
		SSBP1
		MIR4800 /// MXD4
		GOLGA4
		TMF1
		SELENBP1
		DPYSL3
		ATRN
		RANGAP1
		SLC33A1
		IRX5
		GINS1
		UTRN
		SMC3
		MSH6
		SLCO2A1
		SLC38A10
		PLIN2
		ENOSF1
		ABHD2
		TRIP12
		EZR
		CHI3L1
		ADAMTS2
		BRD8
		NKTR
		AHCYL1
		TIAM1
		PBX1
		ZNF711
		MIR6883 /// PER1
		ECE1
		IER3
		DDX39A
		RIMBP2
		MAP7
		RANBP1
		STK3
		CD200
		CCND1
		RAB4A /// SPHAR
		CD79B
		FMOD
		IRS2
		LRIG1
		CAND2
		SPRYD7
		BCL6
		POR
		SAR1A
		TIMP1
		MRC1
		PDK4
		EPHB1
		ANAPC10
		ZNF33B
		CACNA2D2
		B3GALT2
		CD14
		INPP5F
		SOGA1
		FLT1
		FOXJ3
		CRABP2
		GTF2H1
		SRSF7
		NAMPT
		PLCB4
		ISLR
		PYGB
		RCHY1
		ADAM28
		SH3BP5
		MTMR4
		SORCS3
		GBP1
		SLC35A2
		ARFIP1
		GOLGA2
		EIF4EBP1
		VARS
		MFAP2
		SLC35D1
		COL16A1
		SLC29A1
		SLC25A36
		PCDH17
		TMEM123
		ALDH1A3
		TGIF1
		RPS6KA1
		NCOA2
		CFLAR
		CDKN2C
		KIAA0226
		TRAK1
		WDR37
		ZNF207
		GYG1
		ZNF91
		PMP22
		ARMCX4
		CYFIP2
		CYP1B1
		VGLL4
		VAMP8
		ANXA1
		TRIM23
		FABP7
		EIF3B
		TRIM22
		GJA1
		FASN
		TGM2
		SQSTM1
		ATF3
		RFTN1
		CHST1
		LGALS1
		EXOC6B
		VAMP1
		HLA-E
		BTRC
		TSPAN8
		MUC1
		IGSF1
		TWF1
		MYH9
		DCLK1
		CSH1 /// CSH2 /// CSHL1 /// GH1
		RAI14
		CASP8
		TRO
		BNIP2
		CCNG2
		JAG1
		HLA-DQB1
		SIX3
		LITAF
		GNB2L1 /// SNORD95 /// SNORD96A
		MYT1
		PIK3R3
		SNRPE
		MTHFD2
		FBLN1
		RAF1
		ZYX
		SMOX
		RIMS3
		PRKAR1A
		SARM1
		RGS7
		NSL1
		KBTBD11
		CYB561D2
		GALC
		GNG4
		LOC100506403 /// LOC101928269 /// RUNX1
		SMPDL3A
		FLNB
		SCAI
		GABARAPL1
		TXNL1
		TES
		INHBB
		AP3B2
		CCL2
		CMAHP
		PDCD2
		IDH3A
		ITGA4
		PDGFRL
		ODF2
		PTPRS
		TNC
		PPARA
		PLK2
		SP100
		EPB41L2
		NFIB
		EXPH5
		TSPO
		CREG1
		JUNB
		FAIM2
		GNMT
		SRSF1
		RAB29
		CELP
		GP1BB /// SEPT5 /// SEPT5-GP1BB
		ABAT
		FADS1 /// MIR1908
		CELSR1
		DNAJB9
		BICC1
		PTPRA
		METTL7A
		ITM2A
		2018-09-07
		SDHC
		RNASEH2A
		MAP1B
		ADH1B
		DNAJB12
		CUL2
		ARFGEF1
		2018-09-10
		NPTX1
		ART3
		TJP2
		CCT5
		TM2D1
		BMPR1B
		ABLIM3
		P4HB
		PSMB1
		LGALS8
		SPAG7
		KLF10
		PMM2
		STRN
		GAB1
		SNAI2
		FXYD3
		SEMA3C
		PHF21A
		HCLS1
		TMSB15A /// TMSB15B
		GPLD1
		LOC339166 /// WSCD1
GSE2175 GSE26966 GSE37153	173	STYK1
		HIGD1B
		PGBD5
		KIAA1661
		SYT13
		CHMP2B
		ZNF667
		PPARGC1A
		FAM49A
		PPP1R17
		TAP2
		CCNB2
		TMPRSS3
		MOCOS
		PRDM10
		ZNF135
		BTD
		ZNF804A
		KCNMB4
		LEPRE1
		CNGA1
		SSR3
		FLOT2
		PEAK1
		IL17RB
		ATG13
		OSGEPL1
		MST1
		MYO15A
		APH1A
		SLC20A1
		PRMT3
		KCNMB2
		PRR3
		DKK2
		MGAT4B
		RIPK4
		HS3ST1
		SLC6A6
		SLC35A5
		MED12
		RBM38
		RUNX1T1
		NTS
		HIST1H2BE
		TMEM97
		KBTBD4
		TST
		MAPRE2
		CEACAM1
		P2RX7
		MCTP1
		DCK
		RFC3
		LAIR2
		NPAT
		FCN2
		CHST4
		PRUNE
		DNAJC12
		VAV2
		PBK
		RAPGEF4
		CLCN5
		PDE11A
		GNB5
		CCDC88C
		ZNF93
		LRRC16A
		NDUFA10
		CISH
		NANS
		CTC1
		SEC22A
		NUSAP1
		MPST
		GPSM2
		CCNB1
		GSTCD
		SLC8A1
		MANEA
		WHSC1
		FAM98A
		UFM1
		FBXL14
		TOR3A
		MED27
		PCSK6
		ARFRP1
		CBS
		YPEL1
		MAPK8IP2
		C12orf49
		TLE3
		PRC1
		OSBPL7
		TRIOBP
		MCM2
		NBL1
		FAT1
		CELSR2
		CIAPIN1
		FRMPD1
		RND2
		SKIL
		MT2A
		DUSP22
		ARPP21
		ARHGEF12
		MAGT1
		NGB
		SLC38A2
		GPR176
		DCAF7
		ITPR2
		CSH1
		RAB17
		WIPI1
		CA10
		FANCI
		SEMA4G
		DOCK5
		CDKN2A
		PDIA4
		EPB41L5
		TMEM39A
		TMEM33
		LANCL2
		PIEZO2
		CLN6
		PTPN14
		NFATC3
		PSEN2
		LSAMP
		FAM111A
		ARHGAP32
		SMAD2
		HS3ST3B1
		CSGALNACT1
		ELOVL2
		RAB11FIP1
		SPRY4
		SLCO5A1
		GRIA4
		KAT7
		SATB1
		SLC22A4
		FRAT1
		DNAJC3
		AVPI1
		GM2A
		KIF2C
		SLC24A2
		FAM149B1
		CLASP2
		EIF2AK3
		PBX3
		HMGA2
		DNAJC6
		DPF3
		DLG2
		SLC22A17
		EDA
		SRPRB
		HIF1AN
		ARC
		CAB39L
		RAB27A
		RFX4
		PSME3
		REXO2
		DENND2D
		EAF2
GSE2175 GSE36314 GSE37153	168	KCNG1
		ATP5G2
		CA11
		IPO13
		UNG
		ITSN1
		R3HDM2
		PAWR
		E2F4
		PPP6R2
		ZNF165
		FCGR2A
		CSDC2
		HTR4
		AKT2
		SLC25A4
		ACOT11
		ERBB2
		SEC61G
		COMP
		ENO3
		SFTPC
		BLZF1
		XRCC2
		MAP4
		ARVCF
		SMARCD1
		MECP2
		CACNA1E
		GNPDA1
		CHD3
		ABCD2
		AKAP10
		ATN1
		CRLF1
		PYCR1
		SRSF8
		NAPA
		PEX2
		ELK1
		SPTB
		SLC2A4
		ADH1A
		MKRN3
		SLC29A2
		PEMT
		PPM1F
		PTPN13
		URM1
		OXT
		CAND1
		TBL3
		CES2
		TPI1
		CYHR1
		BMP7
		KCNAB1
		CDR2L
		GTSE1
		RPL24
		CHGB
		SBF1
		UBE3B
		TCEB1
		GRINA
		PDCD1
		KMO
		NHLH1
		SRRM2
		PIAS3
		E2F1
		MSX2
		DNALI1
		KAZALD1
		DOLPP1
		RPL22
		CHUK
		GPR45
		TYRO3
		CUX2
		GRIN1
		CCNG1
		CTBS
		FLAD1
		SF3B4
		SMR3B
		HMGA1
		HIPK1
		SNX17
		ABCA3
		FAM134B
		RABGGTA
		SLC26A10
		LUZP1
		KLK8
		BCHE
		BRD4
		SDHD
		KDM6B
		SENP3
		OIP5
		PES1
		UBOX5
		KRT16
		MECOM
		KIF1A
		CTRL
		KCNQ3
		MAPKBP1
		CHRNE
		PTPRZ1
		SCML2
		ARHGAP33
		TAPBP
		MYO16
		VGLL1
		MPO
		NR1H2
		PTGDS
		UBE2C
		SYK
		CYP27A1
		AZGP1
		IL6ST
		PGC
		AKT1
		TCF7
		PSEN1
		CENPF
		PAK1
		CDS1
		TCF4
		PNPLA6
		GAD2
		ATXN2
		RASSF9
		ASB1
		VIL1
		RAD51AP1
		STS
		SETD1A
		MAPK8IP3
		GNA12
		PGK1
		MTFR1
		GPR162
		THOC2
		TSC22D3
		PAPPA
		SLC34A1
		COG2
		TNFRSF4
		SLC6A13
		NRG2
		GUCA2B
		SLC7A5
		BAP1
		PRRC2A
		CR2
		KLC1
		RHOBTB3
		CNP
		SOX11
		LPCAT3
		SMARCA2
		SYNPO
		ARAF
		MAT2A
GSE26966 GSE36314 GSE37153	15	HIST2H2BE
		ZMYM3
		PEG10
		AES
		INPP5J
		OCRL
		SSBP2
		SIX6
		PEA15
		HIST1H2AC
		GNB3
		EFNA1
		TMEM109
		CALM1
		GPAA1
GSE2175 GSE26966	938	FSTL1
		PKNOX2
		ZHX3
		CLK4
		IRAK1
		CDK14
		IPO9
		RPS6KA5
		DHRS11
		BRCA1
		TEK
		COL1A1
		GDPD5
		ANKRD6
		LTBP4
		ARHGEF9
		GYPC
		HP /// HPR
		EMC1
		CHST15
		PMF1
		GMPPA
		AGPS
		TDRKH
		PRR5
		AHI1
		CSH1 /// CSHL1 /// GH1 /// GH2
		DLEC1
		KRCC1
		NFYC
		PLSCR4
		PRKX /// PRKY
		MIR21 /// VMP1
		DCTN1
		SLC2A10
		ARHGEF26
		PREX2
		KIF4A
		SNCAIP
		PECR
		XAF1
		TCFL5
		TAC1
		TAF1D
		ZNF750
		SNCA
		SPATS2L
		ARHGAP26
		MAP3K6
		PROS1
		TOMM22
		TMEM132A
		EPN1
		CLCNKB
		PSMA5
		PIAS1
		RERGL
		STMN1
		ZNF287
		FAM153A /// FAM153B /// FAM153C /// LOC100507387 /// LOC101928349 /// LOC101930363
		ACSS3
		INTS7
		SLC12A7
		PPP1R15A
		CSNK1E
		CEND1
		PXMP4
		TSKU
		ATPIF1
		POLR1B
		SAMHD1
		PKD1P1
		NLK
		GALNT6
		RNF146
		ZNF10
		GTF2IRD2B
		LGALS3
		FCF1
		PSD4
		TBL1XR1
		LPCAT4
		FAM184A
		SLC3A2
		PIWIL2
		C5orf30
		WISP1
		GAS2
		HEATR6
		RUNX2
		MBNL3
		SDC3
		ZSCAN31
		FECH
		ARG2
		CABYR
		RAB40C
		ZCCHC2
		DOK5
		MICAL1
		AREL1
		GSTM5
		SDF2L1
		PSPC1
		ARHGAP24
		C1QA
		KIF22
		NINJ1
		RSF1
		TPR
		HIST1H2BH
		FKBP11
		AP2A2
		TBC1D8B
		XPO7
		TRIM5
		RRAGB
		RCN2
		FLVCR2
		SMAD6
		MAPK8IP1
		CLDN22 /// WWC2
		CHPT1
		GPHN
		ORC3
		TAF4B
		SLC25A37
		DGCR9
		GTF2E1
		SLC39A14
		ACACA
		ZCCHC4
		COQ7
		ZNF43
		ZBTB38
		MINK1
		MGAT1
		DNASE1L3
		PPAP2C
		RAB14
		CDK2AP2
		B4GALT1
		ECE2
		ARL4C
		GALR1
		SLC47A1
		TRPC7
		SERPINA1
		FAM188A
		NR5A1
		POLA1
		ZDHHC4
		RPAP3
		CWF19L1
		CLUL1
		MAML3
		EDNRB
		SCD
		SYNJ2
		CD8B /// LOC100996919
		TMEM214
		OXR1
		MRPL35
		ABI3BP
		ITM2C
		PELI1
		UBE2B
		SOAT1
		SPAG4
		KPNA5
		MIEF1
		ZNF184
		RAP2B
		CSRNP3
		GLRA3
		KANSL1L
		TMEM100
		MAGEH1
		IVNS1ABP
		FOSL2
		SERGEF
		CSH1 /// CSH2
		DNAJA2
		CHM
		CCNL1
		FAM105A
		DUSP6
		DSCAM
		LY75
		ZSCAN2
		LOC441204
		PUS7
		NPEPL1
		TUBB6
		FOXL2
		NTN1
		NGLY1
		SIL1
		EFNB2
		GTF3C4
		RBM22
		PLBD1
		GCFC2
		TRIM38
		TMCC1
		GLYR1
		SLC12A5
		NRIP3
		NOS1AP
		GFAP
		ITFG1
		C3orf18
		C18orf25
		MAGEL2
		FAM162A
		ACSL6
		KCNB1
		CUEDC1
		PCSK5
		HEMK1
		CKAP5
		QRSL1
		DTWD1
		HSD11B1
		DOCK3
		GSDMD
		ANKRD55
		TRPS1
		HYDIN /// HYDIN2 /// LOC101930373
		MTMR3
		APPL1
		PPP4R4
		ATP2B1
		SMAD5
		ELAVL3
		ZNF200
		CCDC88A
		KLHL24
		SGPP1
		APBA1
		RAB2A
		PLCE1
		APOL2
		U2SURP
		NAALAD2
		BTN3A2 /// BTN3A3
		TAF9B
		CACNA2D1
		POLR3K
		RHOT1
		RPL17 /// RPL17-C18orf32 /// SNORD58A /// SNORD58B /// SNORD58C
		CPLX3
		KNTC1
		GTF3C3
		MFSD11
		KL
		PPP1R9A
		RAB35
		FKRP
		ZNF331
		ZNF24
		PIP4K2B
		UQCC1
		ATG10
		DLGAP4
		MBD5
		BACE2
		CLSTN2
		CD99
		STON1
		AAMDC
		NDNF
		PERP
		PWAR5
		IFI16
		MIR7110 /// PDIA5
		OSBPL10
		TIPIN
		RALGPS1
		NCOA3
		RASSF4
		FNDC3B /// LOC101928615
		SELP
		C1GALT1C1
		DSE
		SFTPD
		FDFT1
		NAV2
		SMCHD1
		S100B
		BMP2
		ALDH1A2 /// LOC101928635
		PDE3A
		GAL3ST1
		RPE /// RPEL1
		GLCE
		CHD1L
		GFRA2
		COL8A1
		TNFSF13
		LOC284009 /// METTL16
		PDE7B
		RHOD
		TCF7L1
		ZCCHC6
		COL11A2
		AAR2
		SASH1
		CDC14B
		LDLRAP1
		HLA-DQB1 /// HLA-DRB1 /// HLA-DRB3 /// HLA-DRB4 /// LOC100996809 /// LOC101060835
		ZNF493
		PPP1R14B
		GNG3
		USP46
		BLVRA
		ENOX1
		AMIGO3 /// GMPPB
		AKAP12
		NSUN6
		FAM175B
		XPNPEP3
		CHST7
		SEMA6D
		LSM8
		ARAP2 /// LOC101928667
		TNFRSF14
		ZFP2
		TTC22
		RNF24
		CELF2
		MAFB
		RAC3
		TFPI
		GABRB3
		GPR85
		SEZ6L
		IL4R
		AKR1C1
		APH1B
		USP36
		LYZ
		F5
		CFH /// CFHR1
		SEMA4F
		METTL13
		NUDT4
		SNTB1
		SLC24A3
		LOC100289097 /// LOC642236
		IFITM1
		SEC24A
		ERGIC2
		RPRM
		ERC1
		CLTC-IT1
		AGO3
		MOB3B
		CCDC25
		ZNF177 /// ZNF559-ZNF177
		ZSCAN18
		KLHDC4
		NR2F1
		PIGZ
		DACH1
		AKR1C2 /// LOC101930400
		TMEM45A
		HIF3A
		SOCS6
		TNFSF10
		SMARCB1
		KIF5B
		MYEF2
		HAUS6
		CACNA1A /// LOC100507353
		IGLL3P
		MYL6
		EPB41L1
		KIAA1549L
		ZCCHC24
		EGFL7
		BNIP3
		STEAP4
		RAD51C
		DRAM1
		MICA /// MICB
		ZKSCAN4
		PTCH1
		LOC101929036 /// PAH
		LHPP
		KCNK12
		ARAP3
		NIPAL2
		CPPED1
		PIN4
		MKRN2
		FAM131A
		ZFX /// ZFY
		CCDC68
		SEL1L
		PHLPP1
		GOLGA7
		DPH5
		WBP1L
		GABARAPL1 /// GABARAPL3
		BDH1
		NPHP4
		C4A /// C4B /// C4B_2
		SMURF1
		TNFSF4
		CHRNA1
		ADAMTS1
		PRKG1
		CFI
		ANKFY1
		FIP1L1
		RHOB
		MTMR7
		HNRNPM
		KLHL22
		TMEM35
		LOC100996756
		CA2
		TNIP2
		TCIRG1
		PARL
		SCAMP1
		MSH2
		MTMR2
		GABRA4
		KLHL29
		CYP26B1
		FMO2
		MSTN
		DTL
		LPAR6
		MST4
		NBR2
		MAD2L1BP
		PPP2R3C
		GMNN
		FDXR
		YAP1
		SIK3
		TAPT1
		HLA-DRB1 /// HLA-DRB4 /// LOC100996809
		H2BFS
		CLIC2
		IFITM1 /// IFITM2
		ETNK1
		TEX30
		EPS15L1
		MGEA5
		ING1
		LRCH3
		GEM
		MLPH
		DGCR2
		GHSR
		POLR3B
		RIT2
		CYP11A1
		HYMAI
		TRIB3
		IFI30 /// PIK3R2
		MREG
		HEPH
		TNS3
		IGSF3
		ACTR8
		ZNF510
		SUPT4H1
		MATR3 /// SNHG4
		NPY6R
		FBXO31
		FRS2
		KLHL41
		SNX19
		NAALADL1
		TIMM22
		LIMD1
		TOX3
		CHST11
		GSTM4
		CNOT1
		LSM4
		RHBDF1
		RASIP1
		IL6R
		ECEL1
		CENPU
		SPRY2
		OSR2
		CEP85
		PBLD
		ATP6V1C1
		KCNA4
		SH3PXD2A
		MT1G
		GPBP1L1
		DUS4L
		KCNJ6
		CHMP6
		KIAA0226L
		TCF21
		KLF2
		TFE3
		KLHL28
		RAB20
		XPO4
		MKLN1
		WHAMMP2 /// WHAMMP3
		OPN3
		IGFBP2
		NOTCH2
		CD93
		CEP164
		ANP32A
		DNAJC1
		TRPC1
		ZFHX2
		RABL6
		KAT5
		SF3B5
		SLC37A1
		SUPT16H
		CHPF2
		GSK3B
		TNFAIP3
		MIR7114 /// NSMF
		SFXN3
		GCLC
		CCL14 /// CCL15-CCL14
		EFR3B
		WFS1
		KDM4A
		YBX1
		FIG4
		DCTN4
		NRN1
		F13A1
		ENTPD6
		KIAA0513
		SIRT5
		FXYD5
		HLA-DQB1 /// LOC101060835
		CDK3 /// TEN1-CDK3
		EML4
		ELAC1
		ABCA11P
		TBX3
		GDF11
		CEP192
		HIST1H2BC /// HIST1H2BE /// HIST1H2BF /// HIST1H2BG /// HIST1H2BI
		PWP1
		CACNB2
		HSPA1A /// HSPA1B
		ESRP1
		TMEM243
		HERC5
		SHANK2
		CDKN1A
		ZNF37BP
		PDGFRA
		NOVA1
		FZD3
		TFEB
		SLC27A2
		WRNIP1
		SFT2D2
		DCN
		NXF2 /// NXF2B
		FAM13B
		USP39
		RMND1
		LINC00472
		SFT2D3 /// WDR33
		RBM48
		ARFGAP1
		CYP4B1
		RP4-781L3.1
		FAM174B
		CDIP1
		RCN3
		CSH1 /// CSHL1 /// GH1
		LOC102725198 /// RASA4 /// RASA4B /// RASA4CP
		HECA
		CXCL14
		SEC24D
		MDFIC
		MNAT1
		LZTR1
		CLDN11
		TIMP3
		YOD1
		THAP10
		FMO4
		MYO1C
		MIR612 /// NEAT1
		FAS
		OSMR
		PARVA
		C8orf4
		LMF1
		SLCO3A1
		LARS
		TSGA10
		HAL
		COLGALT2
		NDUFB4
		COL4A3
		POGK
		RIPK2
		EFNB3
		GRHL2
		NOL3
		NOTCH2NL
		GNL3 /// SNORD19B
		ZFHX4
		TFPT
		SPOCK3
		FKBP10
		VLDLR
		DBT
		ITGB6 /// LOC100505984
		SMIM7
		LIN7A
		CA5BP1
		RUVBL1
		AGK
		MIR22 /// MIR22HG
		PKP4
		GBP2
		MRC2
		CYAT1 /// IGLC1 /// IGLV1-44
		POMGNT1
		MARS /// MIR6758
		GRHPR
		TIE1
		CASP7
		EDEM2
		USP53
		C10orf10
		MLLT3
		DYNC2H1
[truncated: 12,347 more rows]
